# Supplementary material for: Explicitly correlated coupled cluster calculations for the propargyl cation (H2C3H+) and related species
Source: Royal Society of Chemistry journal article supplement (doi:10.1039/c1cp20206e), 2011-01-01
Supplement: c1cp20206e.pdf [file c1cp20206e.pdf]

## Electronic Supplementary Information

Peter BOTSCHWINA\* and Rainer OSWALD

*Institut für Physikalische Chemie, Universität Göttingen, Tammannstrasse 6,  
D-37077 Göttingen, Germany*

Guntram RAUHUT\*

*Institut für Theoretische Chemie, Universität Stuttgart, Pfaffenwaldring 55,  
D-70569 Stuttgart, Germany*

### Explicitly correlated coupled cluster calculations for the propargyl cation ( $\text{H}_2\text{C}_3\text{H}^+$ ) and related species

5 tables

Tables S1 and S2 report the parameters of the five-dimensional potential energy function (PEF) and electric dipole moment (EDMF) for  $\text{H}_2\text{C}_3\text{H}^+$ , as obtained by CCSD(T\*)-F12a with the VTZ-F12 basis. PEF and EDMF are represented in polynomial form according to eq. (2) of the printed version. The mass-independent curvilinear symmetry coordinates  $S_1 - S_5$  are defined as follows:

$$S_1 = \frac{1}{\sqrt{2}} (\Delta r_1 + \Delta r_1') \quad \text{methylene symmetric CH stretch} \quad (2a)$$

$$S_2 = -\sqrt{\frac{3}{2}} \Delta \alpha \quad \text{CH}_2 \text{ scissoring} \quad (2b)$$

$$S_3 = \Delta R_1 \quad \text{C - C stretch} \quad (2c)$$

$$S_4 = \Delta R_2 \quad \text{C} \equiv \text{C stretch} \quad (2d)$$

$$S_5 = \Delta r_2 \quad \text{acetylenic CH stretch} \quad (2e)$$

$S_1 - S_5$  are difference coordinates, taken with respect to the CCSD(T\*)-F12a/VTZ-F12 equilibrium geometrical parameters as given in Table 1 of the printed version.

**Table S1.** Coefficients of 5D potential energy function (PEF) for  $\text{H}_2\text{C}_3\text{H}^+$ .<sup>a</sup>

| i | j | k | l | m | coefficient | i | j | k | l | m | coefficient |
|---|---|---|---|---|-------------|---|---|---|---|---|-------------|
| 2 | 0 | 0 | 0 | 0 | 0.1770689   | 2 | 1 | 0 | 0 | 0 | 0.0039397   |
| 3 | 0 | 0 | 0 | 0 | -0.1256960  | 1 | 2 | 0 | 0 | 0 | -0.0160126  |
| 4 | 0 | 0 | 0 | 0 | 0.0600174   | 0 | 2 | 1 | 0 | 0 | -0.0037637  |
| 5 | 0 | 0 | 0 | 0 | -0.0244255  | 0 | 1 | 2 | 0 | 0 | -0.0059236  |
| 6 | 0 | 0 | 0 | 0 | 0.0066142   | 0 | 0 | 2 | 1 | 0 | -0.0307133  |
| 0 | 2 | 0 | 0 | 0 | 0.0521693   | 0 | 0 | 1 | 2 | 0 | -0.0065767  |
| 0 | 3 | 0 | 0 | 0 | 0.0056291   | 0 | 0 | 0 | 2 | 1 | 0.0003306   |
| 0 | 4 | 0 | 0 | 0 | 0.0004121   | 0 | 0 | 0 | 1 | 2 | 0.0043960   |
| 0 | 5 | 0 | 0 | 0 | 0.0003519   | 2 | 0 | 1 | 0 | 0 | 0.0031125   |
| 0 | 6 | 0 | 0 | 0 | -0.0002270  | 1 | 0 | 2 | 0 | 0 | -0.0095736  |
| 0 | 7 | 0 | 0 | 0 | 0.0000541   | 0 | 2 | 0 | 1 | 0 | -0.0026580  |
| 0 | 8 | 0 | 0 | 0 | 0.0002058   | 0 | 1 | 0 | 2 | 0 | -0.0004677  |
| 0 | 0 | 2 | 0 | 0 | 0.2680148   | 0 | 0 | 2 | 0 | 1 | 0.0002574   |
| 0 | 0 | 3 | 0 | 0 | -0.2573037  | 0 | 0 | 1 | 0 | 2 | -0.0001220  |
| 0 | 0 | 4 | 0 | 0 | 0.1643201   | 2 | 0 | 0 | 1 | 0 | -0.0006594  |
| 0 | 0 | 5 | 0 | 0 | -0.0903022  | 1 | 0 | 0 | 2 | 0 | -0.0016470  |
| 0 | 0 | 6 | 0 | 0 | 0.0356508   | 0 | 2 | 0 | 0 | 1 | 0.0000399   |
| 0 | 0 | 0 | 2 | 0 | 0.4563055   | 0 | 1 | 0 | 0 | 2 | 0.0000004   |
| 0 | 0 | 0 | 3 | 0 | -0.4712624  | 2 | 0 | 0 | 0 | 1 | -0.0001226  |
| 0 | 0 | 0 | 4 | 0 | 0.3062221   | 1 | 0 | 0 | 0 | 2 | -0.0001470  |
| 0 | 0 | 0 | 5 | 0 | -0.1697592  | 1 | 1 | 1 | 0 | 0 | -0.0088369  |
| 0 | 0 | 0 | 6 | 0 | 0.0751946   | 1 | 1 | 0 | 1 | 0 | -0.0021949  |
| 0 | 0 | 0 | 0 | 2 | 0.1926275   | 1 | 1 | 0 | 0 | 1 | -0.0001012  |
| 0 | 0 | 0 | 0 | 3 | -0.1934798  | 1 | 0 | 1 | 1 | 0 | 0.0081386   |
| 0 | 0 | 0 | 0 | 4 | 0.1313124   | 1 | 0 | 1 | 0 | 1 | 0.0000643   |
| 0 | 0 | 0 | 0 | 5 | -0.0756881  | 1 | 0 | 0 | 1 | 1 | 0.0012679   |
| 0 | 0 | 0 | 0 | 6 | 0.0397474   | 0 | 1 | 1 | 1 | 0 | 0.0043768   |
| 0 | 0 | 0 | 0 | 7 | -0.0196507  | 0 | 1 | 1 | 0 | 1 | 0.0001938   |
| 0 | 0 | 0 | 0 | 8 | 0.0070239   | 0 | 1 | 0 | 1 | 1 | -0.0015843  |
| 1 | 1 | 0 | 0 | 0 | -0.0065340  | 0 | 0 | 1 | 1 | 1 | -0.0002205  |
| 0 | 1 | 1 | 0 | 0 | 0.0286910   | 2 | 2 | 0 | 0 | 0 | 0.0052035   |
| 0 | 0 | 1 | 1 | 0 | 0.0305250   | 0 | 2 | 2 | 0 | 0 | -0.0001063  |
| 0 | 0 | 0 | 1 | 1 | -0.0115982  | 0 | 0 | 2 | 2 | 0 | -0.0056274  |
| 1 | 0 | 1 | 0 | 0 | 0.0066935   | 0 | 0 | 0 | 2 | 2 | 0.0009509   |
| 0 | 1 | 0 | 1 | 0 | 0.0040744   | 2 | 0 | 2 | 0 | 0 | 0.0076077   |
| 0 | 0 | 1 | 0 | 1 | 0.0011230   | 0 | 2 | 0 | 2 | 0 | 0.0039281   |
| 1 | 0 | 0 | 1 | 0 | -0.0000411  | 0 | 0 | 2 | 0 | 2 | 0.0086602   |
| 0 | 1 | 0 | 0 | 1 | -0.0001516  | 2 | 0 | 0 | 2 | 0 | 0.0097254   |
| 1 | 0 | 0 | 0 | 1 | 0.0003860   | 0 | 2 | 0 | 0 | 2 | -0.0009022  |
|   |   |   |   |   |             | 2 | 0 | 0 | 0 | 2 | 0.0059986   |

<sup>a</sup> CCSD(T\*)-F12a / VTZ-F12. Coefficients are given in atomic units.

**Table S1**, continued.

| i | j | k | l | m | coefficient | i | j | k | l | m | coefficient |
|---|---|---|---|---|-------------|---|---|---|---|---|-------------|
| 3 | 1 | 0 | 0 | 0 | -0.0002350  | 0 | 0 | 1 | 1 | 2 | -0.0001936  |
| 1 | 3 | 0 | 0 | 0 | -0.0023922  | 2 | 1 | 0 | 1 | 0 | -0.0008883  |
| 0 | 3 | 1 | 0 | 0 | 0.0028866   | 1 | 2 | 0 | 1 | 0 | -0.0001997  |
| 0 | 1 | 3 | 0 | 0 | -0.0011169  | 1 | 1 | 0 | 2 | 0 | 0.0001980   |
| 0 | 0 | 3 | 1 | 0 | 0.0264671   | 2 | 1 | 0 | 0 | 1 | 0.0000463   |
| 0 | 0 | 1 | 3 | 0 | 0.0088461   | 1 | 2 | 0 | 0 | 1 | 0.0001002   |
| 0 | 0 | 0 | 3 | 1 | 0.0007843   | 1 | 1 | 0 | 0 | 2 | -0.0000125  |
| 0 | 0 | 0 | 1 | 3 | -0.0001105  | 2 | 0 | 1 | 1 | 0 | 0.0005281   |
| 3 | 0 | 1 | 0 | 0 | -0.0022351  | 1 | 0 | 2 | 1 | 0 | -0.0028491  |
| 1 | 0 | 3 | 0 | 0 | 0.0023068   | 1 | 0 | 1 | 2 | 0 | -0.0011332  |
| 0 | 3 | 0 | 1 | 0 | -0.0030161  | 2 | 0 | 1 | 0 | 1 | 0.0000418   |
| 0 | 1 | 0 | 3 | 0 | -0.0021194  | 1 | 0 | 2 | 0 | 1 | 0.0000472   |
| 0 | 0 | 3 | 0 | 1 | -0.0000178  | 1 | 0 | 1 | 0 | 2 | 0.0000375   |
| 0 | 0 | 1 | 0 | 3 | 0.0009683   | 2 | 0 | 0 | 1 | 1 | -0.0000264  |
| 3 | 0 | 0 | 1 | 0 | 0.0013584   | 1 | 0 | 0 | 2 | 1 | -0.0000337  |
| 1 | 0 | 0 | 3 | 0 | 0.0030377   | 1 | 0 | 0 | 1 | 2 | 0.0000019   |
| 0 | 3 | 0 | 0 | 1 | -0.0005133  | 0 | 2 | 1 | 0 | 1 | -0.0004873  |
| 0 | 1 | 0 | 0 | 3 | -0.0008969  | 0 | 1 | 2 | 0 | 1 | -0.0001216  |
| 3 | 0 | 0 | 0 | 1 | 0.0002088   | 0 | 1 | 1 | 0 | 2 | -0.0000071  |
| 2 | 1 | 1 | 0 | 0 | 0.0008659   | 0 | 2 | 0 | 1 | 1 | 0.0000605   |
| 1 | 2 | 1 | 0 | 0 | 0.0033659   | 0 | 1 | 0 | 2 | 1 | 0.0001412   |
| 1 | 1 | 2 | 0 | 0 | 0.0012252   | 0 | 1 | 0 | 1 | 2 | -0.0000606  |
| 0 | 2 | 1 | 1 | 0 | 0.0063591   | 1 | 1 | 1 | 1 | 0 | -0.0014025  |
| 0 | 1 | 2 | 1 | 0 | 0.0051556   | 0 | 1 | 1 | 1 | 1 | -0.0002673  |
| 0 | 1 | 1 | 2 | 0 | -0.0025989  | 1 | 1 | 1 | 0 | 1 | 0.0001860   |
| 0 | 0 | 2 | 1 | 1 | 0.0002008   | 1 | 1 | 0 | 1 | 1 | -0.0000830  |
| 0 | 0 | 1 | 2 | 1 | 0.0003406   | 1 | 0 | 1 | 1 | 1 | -0.0002498  |

**Table S2.** Coefficients of 5D electric dipole moment function (EDMF) for  $\text{H}_2\text{C}_3\text{H}^+$ . <sup>a</sup>

| i | j | k | l | m | coefficient | i | j | k | l | m | coefficient |
|---|---|---|---|---|-------------|---|---|---|---|---|-------------|
| 1 | 0 | 0 | 0 | 0 | -0.22893    | 0 | 1 | 1 | 0 | 0 | 0.02665     |
| 2 | 0 | 0 | 0 | 0 | 0.01081     | 0 | 2 | 1 | 0 | 0 | 0.08884     |
| 3 | 0 | 0 | 0 | 0 | -0.00121    | 0 | 1 | 2 | 0 | 0 | -0.04804    |
| 4 | 0 | 0 | 0 | 0 | 0.01024     | 0 | 0 | 1 | 1 | 0 | 0.45576     |
| 5 | 0 | 0 | 0 | 0 | -0.00182    | 0 | 0 | 2 | 1 | 0 | 0.14738     |
| 6 | 0 | 0 | 0 | 0 | 0.00040     | 0 | 0 | 1 | 2 | 0 | -0.38466    |
| 0 | 1 | 0 | 0 | 0 | -0.18213    | 0 | 0 | 0 | 1 | 1 | 0.20257     |
| 0 | 2 | 0 | 0 | 0 | 0.00997     | 0 | 0 | 0 | 2 | 1 | -0.04029    |
| 0 | 3 | 0 | 0 | 0 | -0.04682    | 0 | 0 | 0 | 1 | 2 | 0.05693     |
| 0 | 4 | 0 | 0 | 0 | -0.01230    | 1 | 0 | 1 | 0 | 0 | -0.12363    |
| 0 | 5 | 0 | 0 | 0 | -0.00589    | 2 | 0 | 1 | 0 | 0 | -0.00521    |
| 0 | 6 | 0 | 0 | 0 | -0.00112    | 1 | 0 | 2 | 0 | 0 | -0.08741    |
| 0 | 7 | 0 | 0 | 0 | 0.00022     | 0 | 1 | 0 | 1 | 0 | 0.03382     |
| 0 | 8 | 0 | 0 | 0 | 0.00073     | 0 | 2 | 0 | 1 | 0 | -0.02990    |
| 0 | 0 | 1 | 0 | 0 | -0.85537    | 0 | 1 | 0 | 2 | 0 | -0.02450    |
| 0 | 0 | 2 | 0 | 0 | -0.13988    | 0 | 0 | 1 | 0 | 1 | 0.00815     |
| 0 | 0 | 3 | 0 | 0 | 0.20043     | 0 | 0 | 2 | 0 | 1 | 0.04016     |
| 0 | 0 | 4 | 0 | 0 | -0.07564    | 0 | 0 | 1 | 0 | 2 | -0.01087    |
| 0 | 0 | 5 | 0 | 0 | 0.01341     | 1 | 0 | 0 | 1 | 0 | -0.06550    |
| 0 | 0 | 6 | 0 | 0 | -0.03681    | 2 | 0 | 0 | 1 | 0 | 0.00504     |
| 0 | 0 | 0 | 1 | 0 | 0.84789     | 1 | 0 | 0 | 2 | 0 | -0.01259    |
| 0 | 0 | 0 | 2 | 0 | -0.28363    | 0 | 1 | 0 | 0 | 1 | 0.01586     |
| 0 | 0 | 0 | 3 | 0 | 0.10239     | 0 | 2 | 0 | 0 | 1 | 0.00236     |
| 0 | 0 | 0 | 4 | 0 | 0.12673     | 0 | 1 | 0 | 0 | 2 | 0.00559     |
| 0 | 0 | 0 | 5 | 0 | 0.02215     | 1 | 0 | 0 | 0 | 1 | 0.00713     |
| 0 | 0 | 0 | 6 | 0 | -0.02586    | 2 | 0 | 0 | 0 | 1 | 0.00346     |
| 0 | 0 | 0 | 0 | 1 | 0.46308     | 1 | 0 | 0 | 0 | 2 | 0.00000     |
| 0 | 0 | 0 | 0 | 2 | 0.07773     | 1 | 1 | 1 | 0 | 0 | -0.03284    |
| 0 | 0 | 0 | 0 | 3 | -0.00033    | 1 | 1 | 0 | 1 | 0 | 0.01254     |
| 0 | 0 | 0 | 0 | 4 | -0.02956    | 1 | 1 | 0 | 0 | 1 | 0.00792     |
| 0 | 0 | 0 | 0 | 5 | 0.00085     | 1 | 0 | 1 | 1 | 0 | 0.07184     |
| 0 | 0 | 0 | 0 | 6 | -0.00467    | 1 | 0 | 1 | 0 | 1 | -0.01943    |
| 0 | 0 | 0 | 0 | 7 | 0.01466     | 1 | 0 | 0 | 1 | 1 | 0.00301     |
| 0 | 0 | 0 | 0 | 8 | -0.01047    | 0 | 1 | 1 | 1 | 0 | 0.09465     |
| 1 | 1 | 0 | 0 | 0 | -0.07294    | 0 | 1 | 1 | 0 | 1 | 0.00025     |
| 2 | 1 | 0 | 0 | 0 | -0.02525    | 0 | 1 | 0 | 1 | 1 | 0.01992     |
| 1 | 2 | 0 | 0 | 0 | -0.00361    | 0 | 0 | 1 | 1 | 1 | 0.02484     |

<sup>a</sup> CCSD(T\*)-F12a / VTZ-F12. Coefficients are given in atomic units. Electric dipole moments were evaluated in the molecular centre-of-mass coordinate system.

**Table S3.** Nuclear cartesian coordinates of  $\text{H}_2\text{C}_3\text{H}^+ \cdot \text{Ar}$  complexes (in atomic units).<sup>a</sup>

| Coordinate | $C_s$ Min 1 | $C_s$ Min 2 | $C_{2v}$  |
|------------|-------------|-------------|-----------|
| YC1        | 0.018540    | -0.002418   |           |
| ZC1        | -2.514027   | -2.516659   | -2.548959 |
| YC2        | 0.022109    | 0.012211    |           |
| ZC2        | 0.040040    | 0.030459    | 0.000000  |
| YC3        | 0.000938    | 0.017280    |           |
| ZC3        | 2.363266    | 2.358609    | 2.324858  |
| XH1        | 1.771504    | 1.773180    | 1.773162  |
| YH1        | -0.004108   | -0.009154   |           |
| ZH1        | -3.553181   | -3.554663   | -3.445649 |
| XH2        | -1.771504   | -1.773180   | -1.773162 |
| YH2        | -0.004108   | -0.009154   |           |
| ZH2        | -3.553181   | -3.554663   | -3.445649 |
| YH3        | -0.022165   | -0.012168   |           |
| ZH3        | 4.392306    | 4.387401    | 4.360653  |
| YAr        | 5.425735    | 5.692193    |           |
| ZAr        | -4.122429   | 3.918084    | 9.087767  |

<sup>a</sup> CCSD(T\*)-F12a. Basis set: (VTZ-F12, AV (Q+d)Z).

**Table S4.** Intramolecular harmonic vibrational wavenumbers and shifts (in  $\text{cm}^{-1}$ ) for  $C_s$  and  $C_{2v}$  structures of  $\text{H}_2\text{C}_3\text{H}^+ \cdot \text{Ar}^a$

| No. of vibration <sup>b</sup> | $C_s$ Min 1 <sup>c</sup> | $C_s$ Min 2 <sup>c</sup> | $C_{2v}$ <sup>c</sup> |
|-------------------------------|--------------------------|--------------------------|-----------------------|
| 1 ( $1a_1$ )                  | 3362.5 (+4.9)            | 3363.7 (+6.1)            | 3314.2 (-43.4)        |
| 2 ( $1b_2$ )                  | 3231.5 (+6.4)            | 3225.7 (+0.6)            | 3225.5 (+0.4)         |
| 3 ( $2a_1$ )                  | 3121.3 (+6.0)            | 3116.3 (+1.0)            | 3116.3 (+1.0)         |
| 4 ( $3a_1$ )                  | 2121.6 (+0.7)            | 2117.3 (-3.6)            | 2116.4 (-4.5)         |
| 5 ( $4a_1$ )                  | 1479.0 (+0.1)            | 1478.8 (-0.1)            | 1479.8 (+0.9)         |
| 6 ( $5a_1$ )                  | 1129.7 (-2.7)            | 1134.8 (+2.4)            | 1134.0 (+1.6)         |
| 7 ( $1b_1$ )                  | 1114.5 (-2.5)            | 1111.9 (-5.1)            | 1115.8 (+1.2)         |
| 8 ( $2b_2$ )                  | 1036.8 (+0.4)            | 1036.0 (-0.4)            | 1037.4 (+1.0)         |
| 9 ( $2b_1$ )                  | 871.0 (-5.2)             | 872.8 (-3.4)             | 897.8 (+21.6)         |
| 10 ( $3b_2$ )                 | 627.6 (+3.1)             | 622.9 (-1.6)             | 658.7 (+34.2)         |
| 11 ( $4b_2$ )                 | 290.9 (+3.7)             | 288.8 (+1.6)             | 289.2 (+2.0)          |
| 12 ( $3b_1$ )                 | 270.6 (+16.6)            | 269.1 (+15.1)            | 258.5 (+4.5)          |

<sup>a</sup> CCSD(T\*)-F12a. Basis: VTZ-F12/AV(Q+d)Z.

<sup>b</sup> Vibrations are ordered according to decreasing wavenumber. Symmetry classification for free  $\text{H}_2\text{C}_3\text{H}^+$  is given in parentheses.

<sup>c</sup> Shifts with respect to free  $\text{H}_2\text{C}_3\text{H}^+$  are given in parentheses.

**Table S5.** Recommended equilibrium structures and equilibrium rotational constants for cations of type  $\text{H}_2\text{C}_n\text{H}^+$  ( $n = 4-8$ ).

|                | $\text{H}_2\text{C}_4\text{H}^+$ | $\text{H}_2\text{C}_5\text{H}^+$ | $\text{H}_2\text{C}_6\text{H}^+$ | $\text{H}_2\text{C}_7\text{H}^+$ | $\text{H}_2\text{C}_8\text{H}^+$ |
|----------------|----------------------------------|----------------------------------|----------------------------------|----------------------------------|----------------------------------|
| $r_{1e}$ (Å)   | 1.0886                           | 1.0848                           | 1.0862                           | 1.0841                           | 1.0851                           |
| $\alpha_e$ (°) | 119.54                           | 119.08                           | 119.43                           | 118.96                           | 119.36                           |
| $R_{1e}$ (Å)   | 1.2838                           | 1.3333                           | 1.2936                           | 1.3286                           | 1.2986                           |
| $R_{2e}$ (Å)   | 1.3188                           | 1.2444                           | 1.3014                           | 1.2515                           | 1.2940                           |
| $R_{3e}$ (Å)   | 1.2239                           | 1.3298                           | 1.2422                           | 1.3126                           | 1.2508                           |
| $R_{4e}$ (Å)   |                                  | 1.2199                           | 1.3324                           | 1.2367                           | 1.3144                           |
| $R_{5e}$ (Å)   |                                  |                                  | 1.2182                           | 1.3378                           | 1.2344                           |
| $R_{6e}$ (Å)   |                                  |                                  |                                  | 1.2165                           | 1.3408                           |
| $R_{7e}$ (Å)   |                                  |                                  |                                  |                                  | 1.2152                           |
| $r_{2e}$ (Å)   | 1.0715                           | 1.0694                           | 1.0687                           | 1.0675                           | 1.0671                           |
| $A_e$ (GHz)    | 283.39                           | 286.75                           | 285.00                           | 287.48                           | 285.77                           |
| $B_e$ (MHz)    | 4226.9                           | 2193.4                           | 1293.4                           | 821.86                           | 556.83                           |
| $C_e$ (MHz)    | 4164.8                           | 2176.8                           | 1287.5                           | 819.52                           | 555.75                           |
